# Supplementary material
Source: MDPI journal article supplement (https://www.mdpi.com/2073-4344/9/7/621)

# The effect of CeO<sub>2</sub> preparation method on the carbon pathways in dry reforming of methane on 5 wt% Ni/CeO<sub>2</sub> studied by transient techniques

Constantinos M. Damaskinos<sup>1</sup>, Michalis A. Vasiliades<sup>1</sup>, Vassilis N. Stathopoulos<sup>2</sup>, Angelos M. Efstathiou<sup>1,\*</sup>

<sup>1</sup> Heterogeneous Catalysis Laboratory, Chemistry Department, University of Cyprus, 2109 Nicosia, Cyprus; damaskinos.constantinos@hotmail.com (C.M.D.); michael\_vasiliades@hotmail.com (M.A.V.)

<sup>2</sup> Laboratory of Chemistry and Materials Technology, General Department, School of Sciences, National and Kapodistrian University of Athens, GR-34400 Athens, Greece; [vasta@uoa.gr](mailto:vasta@uoa.gr) (V.N.S.)

\* Correspondence: [efstath@ucy.ac.cy](mailto:efstath@ucy.ac.cy) (A.M.E.); Tel.: +357 22 892776

## 2. Results

### 2.1. Catalysts surface texture and structural properties

**Table S1.** Textural and structural characterization of 5 wt% Ni/CeO<sub>2</sub> (-TD, -PT, -HT and -SG) DRM fresh catalysts.

| Catalyst<br>(5 wt% Ni) | SSA<br>(m <sup>2</sup> g <sup>-1</sup> ) | V <sub>P</sub><br>(cm <sup>3</sup> g <sup>-1</sup> ) | d <sub>P</sub> (nm) | d <sub>C</sub> (nm) | a (Å)               | d <sub>Ni</sub> (nm)                   | D <sub>Ni</sub> (%)                   |
|------------------------|------------------------------------------|------------------------------------------------------|---------------------|---------------------|---------------------|----------------------------------------|---------------------------------------|
| CeO <sub>2</sub> -TD   | 23                                       | 0.102                                                | 17.7                | 19.6 <sup>a</sup>   | 5.4088 <sup>a</sup> | 11.0 <sup>b</sup><br>12.4 <sup>c</sup> | 8.8 <sup>b</sup><br>7.8 <sup>c</sup>  |
| CeO <sub>2</sub> -PT   | 5.6                                      | 0.032                                                | 22.5                | 29.9 <sup>a</sup>   | 5.4091 <sup>a</sup> | 13.6 <sup>b</sup><br>15.9 <sup>c</sup> | 7.1 <sup>b</sup><br>6.1 <sup>c</sup>  |
| CeO <sub>2</sub> -HT   | 50                                       | 0.203                                                | 15.8                | 11.5 <sup>a</sup>   | 5.4104 <sup>a</sup> | 8.4 <sup>b</sup><br>10.1 <sup>c</sup>  | 11.5 <sup>b</sup><br>9.6 <sup>c</sup> |
| CeO <sub>2</sub> -SG   | 14.5                                     | 0.029                                                | 6.7                 | 43.1 <sup>a</sup>   | 5.3988 <sup>a</sup> | 20.8 <sup>b</sup><br>28.5 <sup>c</sup> | 4.7 <sup>b</sup><br>3.4 <sup>c</sup>  |

<sup>a</sup> estimated based on the 2θ=28.7° diffraction peak of CeO<sub>2</sub> (111) face; <sup>b</sup> estimated based on the 2θ=37.2° diffraction peak of NiO (111) face and after considering the mass densities of Ni<sup>0</sup> and NiO phases; <sup>c</sup> estimated from TPD studies.

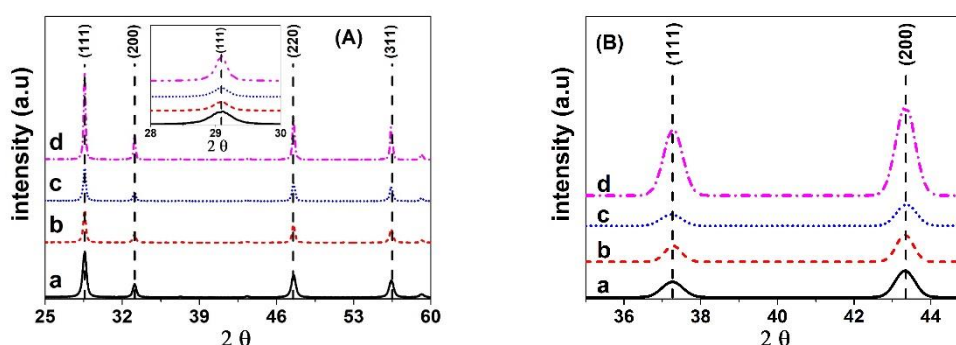

**Figure S1.** Powder X-ray diffractograms of 5 wt% Ni supported on (a) CeO<sub>2</sub>-TD, (b) CeO<sub>2</sub>-PT, (c) CeO<sub>2</sub>-HT and (d) CeO<sub>2</sub>-SG carriers in the (A) 20–70° 2θ and (B) 35–45° 2θ region (diffraction peaks of NiO).

## 2.2. Transmission Electron Microscopy (TEM) studies

Representative HR-TEM micrographs include structural and morphological information about the fresh 5 wt% Ni supported on CeO<sub>2</sub> prepared by the hydrothermal (HT) method (Figs. S2). The 50 nm resolved image shows that the support consists of agglomerated polyhedral primary crystallites (10–20 nm) of CeO<sub>2</sub>. In addition, Fig. S2 image resolved at 10 nm, clearly shows NiO particles in the 8–12 nm range. The latter results correspond closely with the PXRD and H<sub>2</sub>-TPD studies reported in Results section and Table S1.

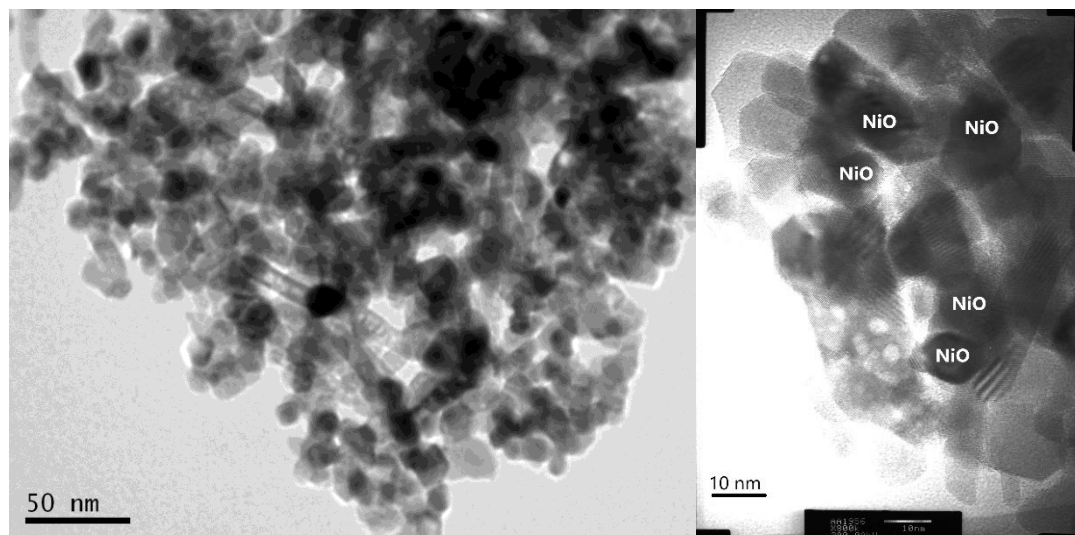

**Figure S2.** Representative HR-TEM images of the calcined (air, 750 °C/4 h) 5 wt% Ni/CeO<sub>2</sub>-HT catalyst. Left graph: magnification at 50 nm unit scale; Right graph: magnification at 10 nm unit scale.

## 2.3. Scanning Electron Microscopy (SEM) studies

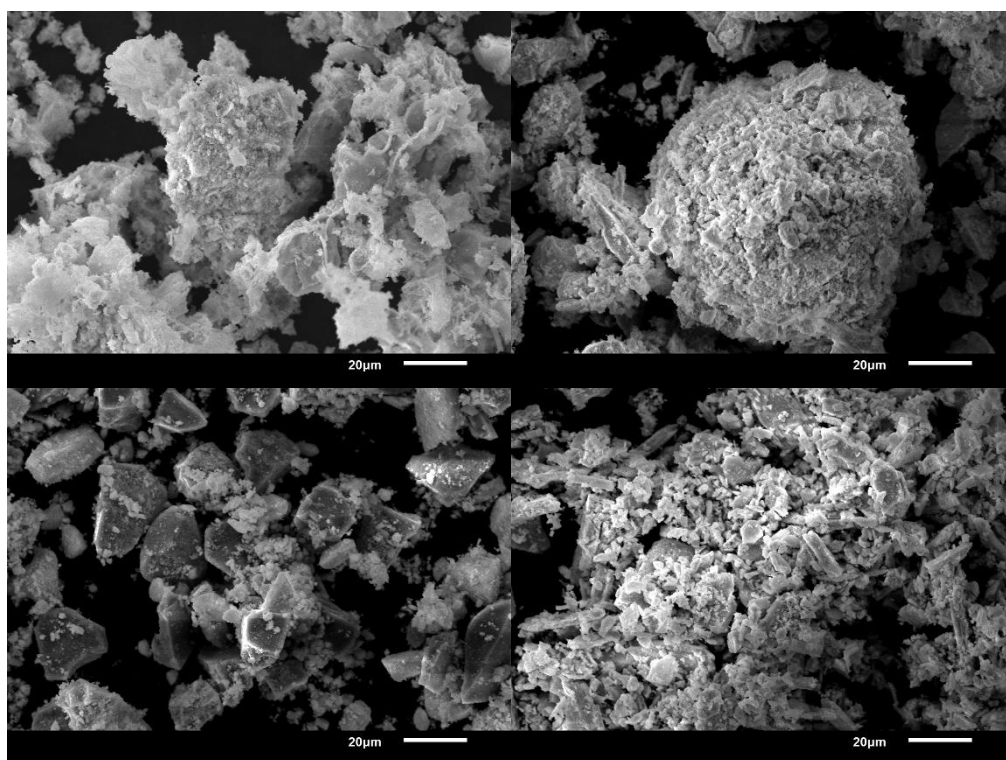

**Figure S3.** SEM images of the fresh Ni/CeO<sub>2</sub>-SG (top left), Ni/CeO<sub>2</sub>-PT (top right), Ni/CeO<sub>2</sub>-HT (down left) and Ni/CeO<sub>2</sub>-TD (down right).

#### 2.4. Catalytic performance studies during DRM

**Table S2.** Catalytic activity in terms of CH<sub>4</sub>, CO<sub>2</sub> conversion ( $X_{CH_4}$ ,  $X_{CO_2}$ , %), H<sub>2</sub> Yield (%) and H<sub>2</sub>/CO gas product ratio obtained after 30 min in DRM at 750 °C for the four ceria supports prepared by different methods.

| Catalyst<br>(5 wt% Ni) | $X_{CH_4}$<br>(%) | $X_{CO_2}$<br>(%) | H <sub>2</sub> Yield<br>(%) | H <sub>2</sub> /CO |
|------------------------|-------------------|-------------------|-----------------------------|--------------------|
| CeO <sub>2</sub> -TD   | 87.5              | 87.4              | 58.4                        | 1.2                |
| CeO <sub>2</sub> -PT   | 89.8              | 89.5              | 51.4                        | 1.2                |
| CeO <sub>2</sub> -HT   | 93.2              | 91                | 55.3                        | 1.2                |
| CeO <sub>2</sub> -SG   | 81.2              | 90.3              | 48.6                        | 1.1                |

**Table S3.** Catalytic stability performance in terms of CH<sub>4</sub>, CO<sub>2</sub> conversion ( $X_{CH_4}$ ,  $X_{CO_2}$ , %), H<sub>2</sub> Yield (%), H<sub>2</sub>/CO gas product ratio and carbon deposition (mg C g<sup>-1</sup><sub>cat</sub>) obtained during DRM (20% CH<sub>4</sub>/20% CO<sub>2</sub>/He) at 750 °C over the 5 wt% Ni/CeO<sub>2</sub>-PT solid.

| TOS (h) | $X_{CH_4}$<br>(%) | $X_{CO_2}$<br>(%) | H <sub>2</sub> Yield<br>(%) | H <sub>2</sub> /CO | C deposition<br>(mg C g <sup>-1</sup> <sub>cat</sub> ) |
|---------|-------------------|-------------------|-----------------------------|--------------------|--------------------------------------------------------|
| 0.5     | 89.8              | 89.5              | 51.4                        | 1.2                | -                                                      |
| 1       | 89.4              | 88.6              | 51.2                        | 1.2                | -                                                      |
| 2       | 89.2              | 88.2              | 50.8                        | 1.2                | -                                                      |
| 6       | 89.1              | 88.0              | 50.8                        | 1.2                | -                                                      |
| 12      | 87.9              | 87.7              | 50.4                        | 1.2                | 30.7                                                   |
| 24      | 75.2              | 84.6              | 50.0                        | 1.2                | -                                                      |
| 36      | 74.6              | 84.1              | 47.6                        | 1.1                | -                                                      |
| 50      | 74.1              | 83.0              | 45.4                        | 1.1                | 147.1                                                  |

**Table S4.** Catalytic activity in terms of CH<sub>4</sub>, CO<sub>2</sub> conversion (X<sub>CH<sub>4</sub></sub>, X<sub>CO<sub>2</sub></sub>, %), H<sub>2</sub> Yield (%) and H<sub>2</sub>/CO gas product ratio obtained after 30 min in DRM (5 vol% <sup>13</sup>CO<sub>2</sub>/5 vol% <sup>12</sup>CH<sub>4</sub>/He) at 750 °C.

| Catalyst 5 wt% Ni    | X <sub>CH<sub>4</sub></sub><br>(%) | X <sub>CO<sub>2</sub></sub><br>(%) | H <sub>2</sub> Yield<br>(%) | H <sub>2</sub> /CO |
|----------------------|------------------------------------|------------------------------------|-----------------------------|--------------------|
| CeO <sub>2</sub> -TD | 97.9                               | 91.3                               | 97.6                        | 1.1                |
| CeO <sub>2</sub> -PT | 98.5                               | 91.6                               | 95.6                        | 1.1                |
| CeO <sub>2</sub> -HT | 98.5                               | 92.0                               | 99.4                        | 1.1                |
| CeO <sub>2</sub> -SG | 95.0                               | 92.0                               | 79.1                        | 1.0                |

### 2.5. Characterization of carbon formed under different reaction conditions

**Table S5.** Carbon accumulation (mg C g<sub>cat</sub><sup>-1</sup>) estimated via TPO followed individual reactions over all catalysts at 750 °C; 20 vol% CO<sub>2</sub>/20 vol% CH<sub>4</sub>/He (12h), 5 vol% <sup>13</sup>CO<sub>2</sub>/5 vol% <sup>12</sup>CH<sub>4</sub>/He (30 min), 20 vol% CH<sub>4</sub>/He (30min), 20 vol% CO/He (30 min), 2.5 vol% <sup>13</sup>CO/2.5 vol% <sup>12</sup>CH<sub>4</sub>/He (20 min).

| Catalyst<br>(5 wt% Ni) | DRM<br>(12 h) | <sup>13</sup> CO <sub>2</sub> / <sup>12</sup> CH <sub>4</sub><br>(30 min) | CH <sub>4</sub> decomp.<br>(30 min) | CO dissoc.<br>(30 min) | <sup>13</sup> CO/ <sup>12</sup> CH <sub>4</sub><br>(20 min) |
|------------------------|---------------|---------------------------------------------------------------------------|-------------------------------------|------------------------|-------------------------------------------------------------|
| CeO <sub>2</sub> -TD   | 66.2          | 0.13                                                                      | 145.1                               | 13.7                   | 67.2                                                        |
| CeO <sub>2</sub> -PT   | 30.7          | -                                                                         | 99.5                                | 32.2                   | 63.5                                                        |
| CeO <sub>2</sub> -HT   | 115.1         | 0.35                                                                      | 81.1                                | 9.2                    | 103.4                                                       |
| CeO <sub>2</sub> -SG   | 80.4          | 0.34                                                                      | 128.3                               | 7.7                    | 78                                                          |

### 2.6. Participation of support's lattice oxygen under DRM conditions

**Table S6.** <sup>18</sup>O consumption (mmol g<sup>-1</sup>) during <sup>16</sup>O/<sup>18</sup>O exchange, C<sup>18</sup>O formation (mmol g<sup>-1</sup>) during DRM following <sup>16</sup>O/<sup>18</sup>O oxygen exchange, and C<sup>18</sup>O/<sup>18</sup>O ratio.

| Catalyst<br>(5 wt% Ni) | <sup>18</sup> O consumption<br>(mmol g <sup>-1</sup> ) | C <sup>18</sup> O production<br>(mmol g <sup>-1</sup> ) | C <sup>18</sup> O/ <sup>18</sup> O |
|------------------------|--------------------------------------------------------|---------------------------------------------------------|------------------------------------|
| CeO <sub>2</sub> -TD   | 12.4                                                   | 5.9                                                     | 0.48                               |
| CeO <sub>2</sub> -PT   | 11                                                     | 3.5                                                     | 0.31                               |
| CeO <sub>2</sub> -HT   | 11.4                                                   | 6.5                                                     | 0.57                               |
| CeO <sub>2</sub> -SG   | 10.2                                                   | 3.3                                                     | 0.32                               |

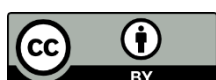

Supplement: s1 [file s1]
